# Supplementary material for: Highly fluorescent fish scale-derived carbon dots for quercetin sensing
Source: Royal Society of Chemistry journal article supplement (doi:10.1039/d4nj02578d), 2024-01-01
Supplement: d4nj02578d1.pdf [file d4nj02578d1.pdf]

## Supplementary Material

### 1. Impact of various modification agents introduced during hydrothermal preparation on the quantum yield of carbon dots derived from fish scales.

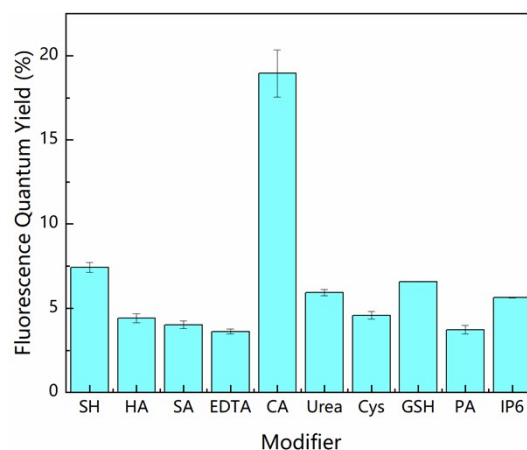

**Figure S1.** The varying influence of different modifiers on the quantum yield of CDs derived from fish scales via the hydrothermal process.

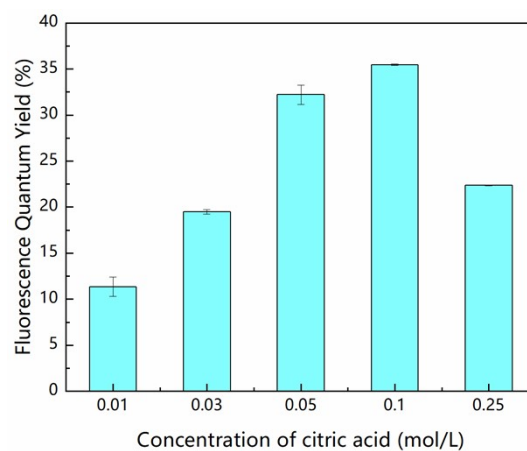

**Figure S2.** Effects of different concentrations of citric acid on the quantum yield of CDs derived from fish scales.

## 2. Photoluminescence decay spectrum of CDs-FS/CA aqueous solution

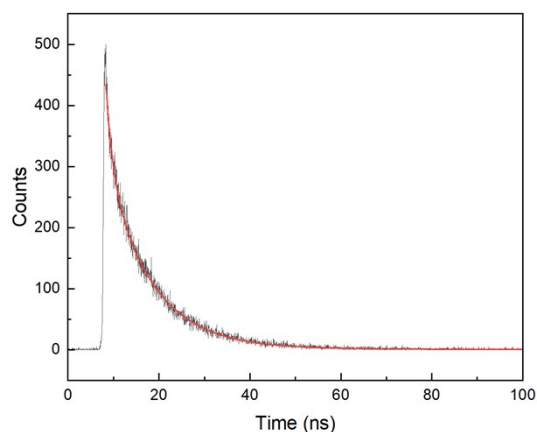

**Figure S3.** Photoluminescence decay spectrum of CDs-FS/CA aqueous solution

## 3. Size distribution histograms of different carbon dots obtained from TEM image measurements.

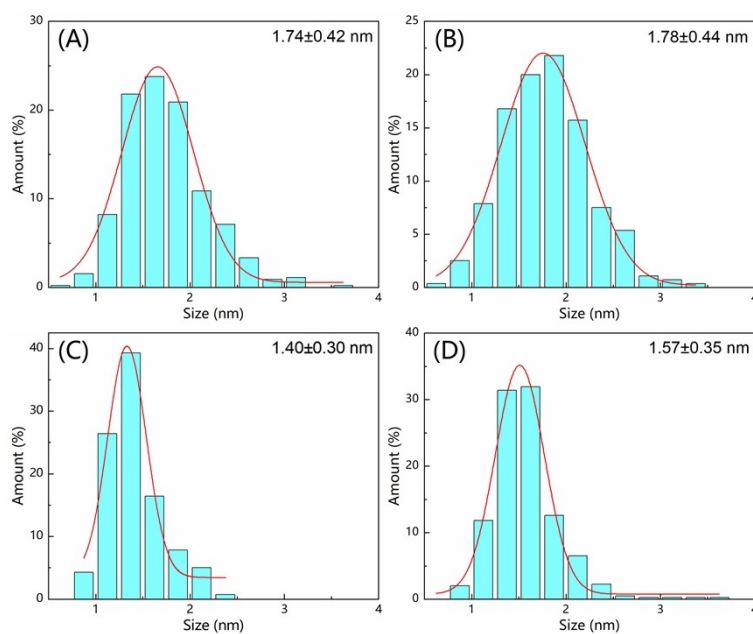

**Figure S4.** Size distribution histogram of CDs-FSP/CA and different control CDs samples.

(A) CDs-FS; (B) CDs-CA; (C) CDs-FS/CA; (D) CDs-FSP/CA.

#### 4. XPS full spectra of different carbon dots.

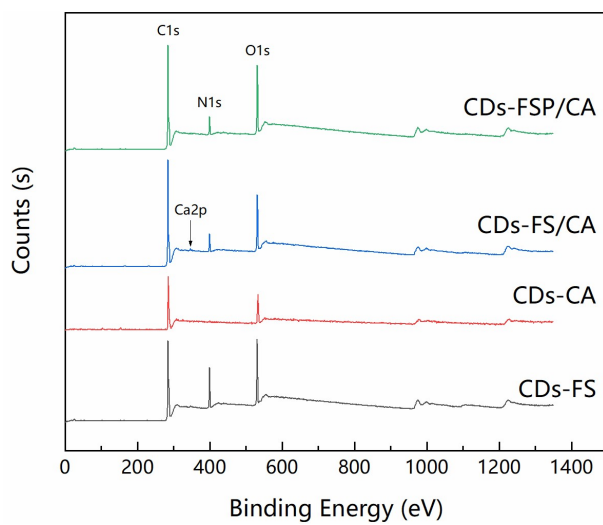

**Figure S5.** XPS full spectra of CD<sub>s</sub>-FSP/CA and different control CD<sub>s</sub> samples.

**5. Measurement and Calculation of the Method Detection Limit (MDL) and Method Quantification Limit (MQL) for CDs-FS/CA**

**Table S1.** Measurement results of MDL and MQL for CDs-FS/CA

|                           | X1    | X2    | X3    | X4    | X5    | X6    | X7    | Average | Standard Deviation |
|---------------------------|-------|-------|-------|-------|-------|-------|-------|---------|--------------------|
| Detection Amount (nmol/L) | 13.75 | 12.56 | 11.81 | 12.65 | 10.61 | 11.78 | 11.99 | 12.16   | 0.97               |
| Recovery Rate (%)         | 110.9 | 101.3 | 95.2  | 102.0 | 85.6  | 95.0  | 96.7  | 98.1    | 7.8                |

$MDL = t_{0.99} \times 0.97 = 3.0$  nmol/L,  $t_{0.99} = 3.143$  is the confidence factor;

$MQL = MDL \times 0.33 = 9.9$  nmol/L
